# Supplementary material for: The CU Mobile Solar Occultation Flux instrument: structure functions and emission rates of NH 3 , NO 2 and C 2 H 6
Source: Copernicus journal article supplement (doi:10.5194/amt-2016-190), 2016-08-24
Supplement: Supplementary file 1 [file amt-2016-190-supplement.pdf]

# 1 **Supplementary Information**

2

## 3 **The CU Mobile Solar Occultation Flux instrument: structure** 4 **functions and emission rates of NH<sub>3</sub>, NO<sub>2</sub> and C<sub>2</sub>H<sub>6</sub>**

5

6 **Natalie Kille<sup>1,2</sup>, Sunil Baidar<sup>2,3,a</sup>, Philip Handley<sup>2,3,a</sup>, Ivan Ortega<sup>2,3,b</sup>, Roman**  
7 **Sinreich<sup>3</sup>, Owen R. Cooper,<sup>4</sup> Frank Hase<sup>5</sup>, James W. Hannigan<sup>6</sup>, Gabriele Pfister<sup>6</sup>,**  
8 **and Rainer Volkamer<sup>1,2,3</sup>**

9 [1]{Department of Atmospheric and Oceanic Sciences, University of Colorado Boulder,  
10 Boulder, CO, USA}

11 [2]{Cooperative Institute for Research in Environmental Sciences (CIRES), Boulder, CO, USA}

12 [3]{Department of Chemistry and Biochemistry, University of Colorado Boulder, Boulder, CO,  
13 USA}

14 [4]{National Ocean Atmosphere Administration (NOAA), Chemical Sciences Division (CSD),  
15 Boulder, CO, USA}

16 [5]{Institut für Meteorologie und Klimaforschung – Atmosphärische Spurengase und  
17 Fernerkundung (IMK-ASF), Karlsruhe Institute of Technology (KIT), Karlsruhe, Germany}

18 [6]{National Center for Atmospheric Research (NCAR), Atmospheric Chemistry Division  
19 (ACD), Boulder, CO, USA}

20 [a]{now at: NOAA/CSD, Boulder, CO, USA}

21 [b]{now at: NCAR/ACOM, Boulder, CO, USA}

22

23 Correspondence to: R. Volkamer (rainer.volkamer@colorado.edu)

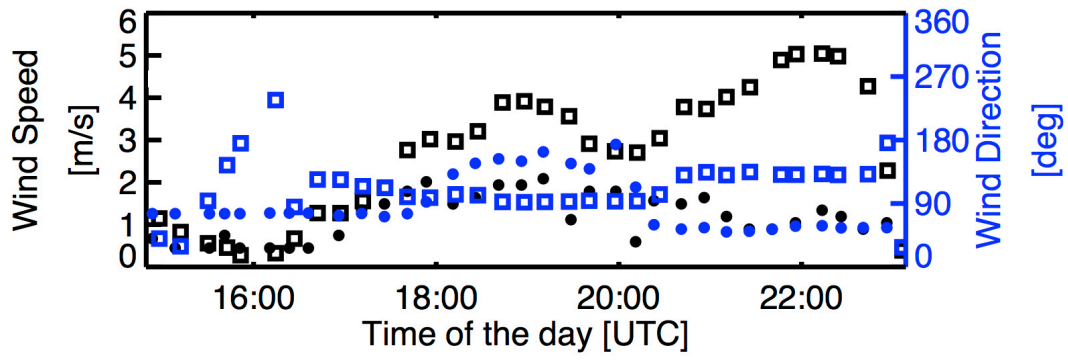

24

25 Figure S1: Timeseries of the surface layer model wind (squares) and ground measurement at the  
26 nearby Eaton, CO measurement station (dots) for RD11.

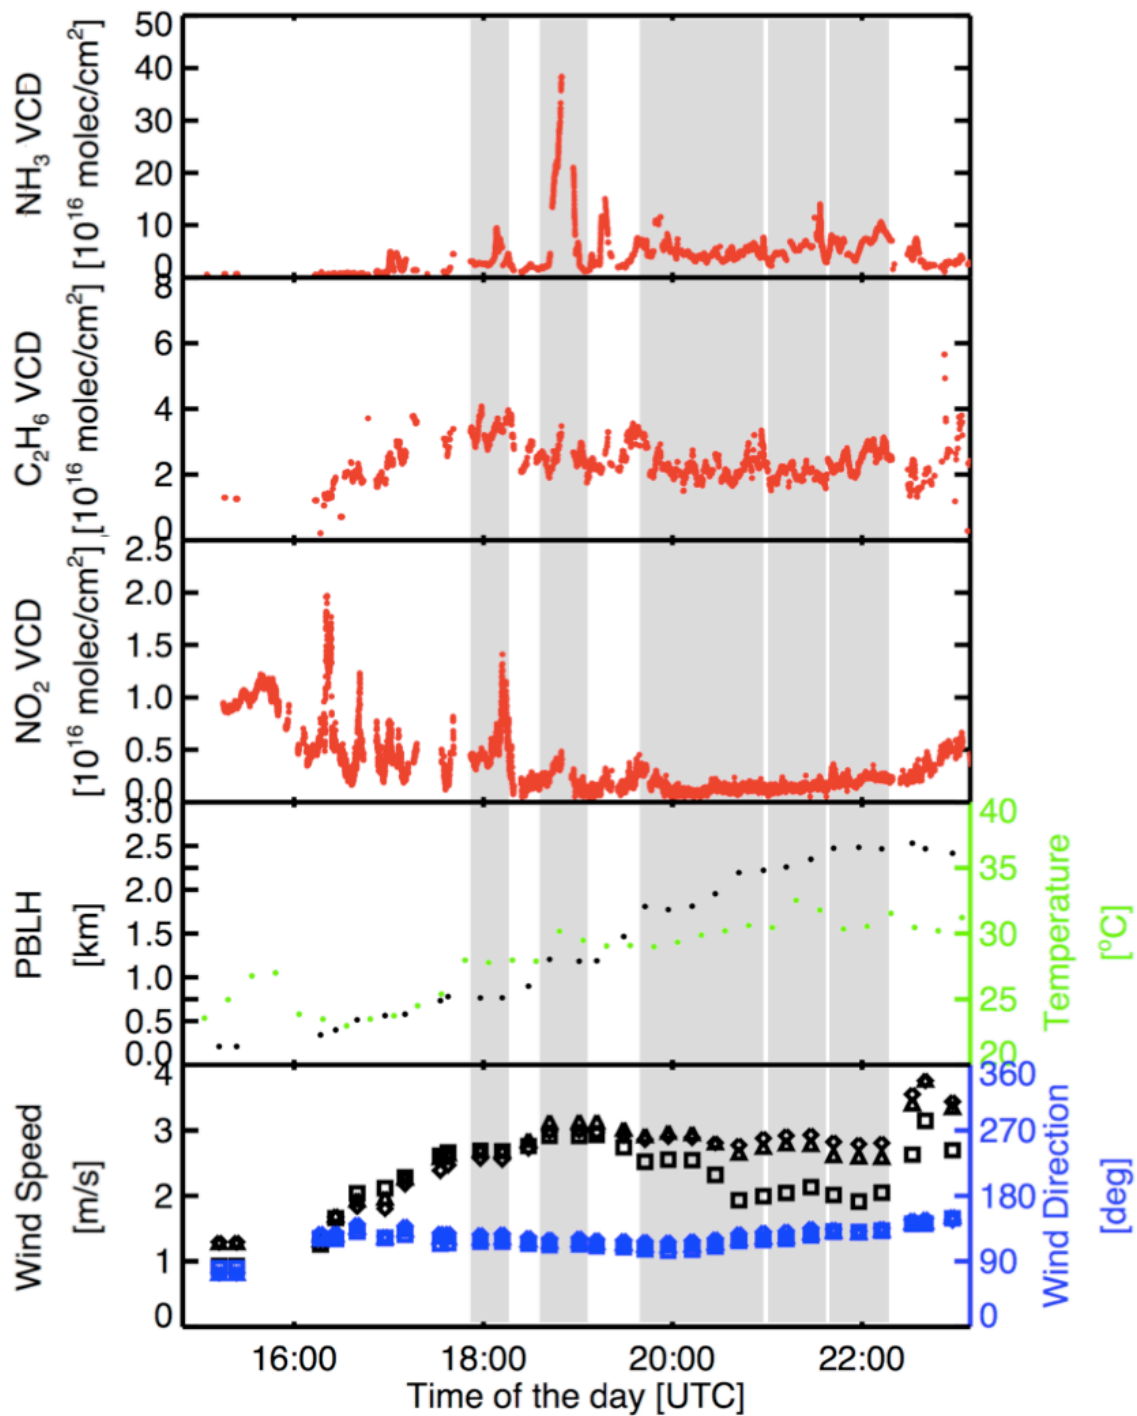

27  
 28 Figure S2: Timeseries of the VCDs measured for A)  $\text{NH}_3$ , B)  $\text{C}_2\text{H}_6$ , C)  $\text{NO}_2$ , during RD10. D)  
 29 PBLH and temperature, E) model wind; (diamonds) model wind averaged over approximately 10  
 30 – 50 m above ground level, (triangles) over half PBLH, (squares) over the full PBLH. Shaded  
 31 areas indicate times at each site.

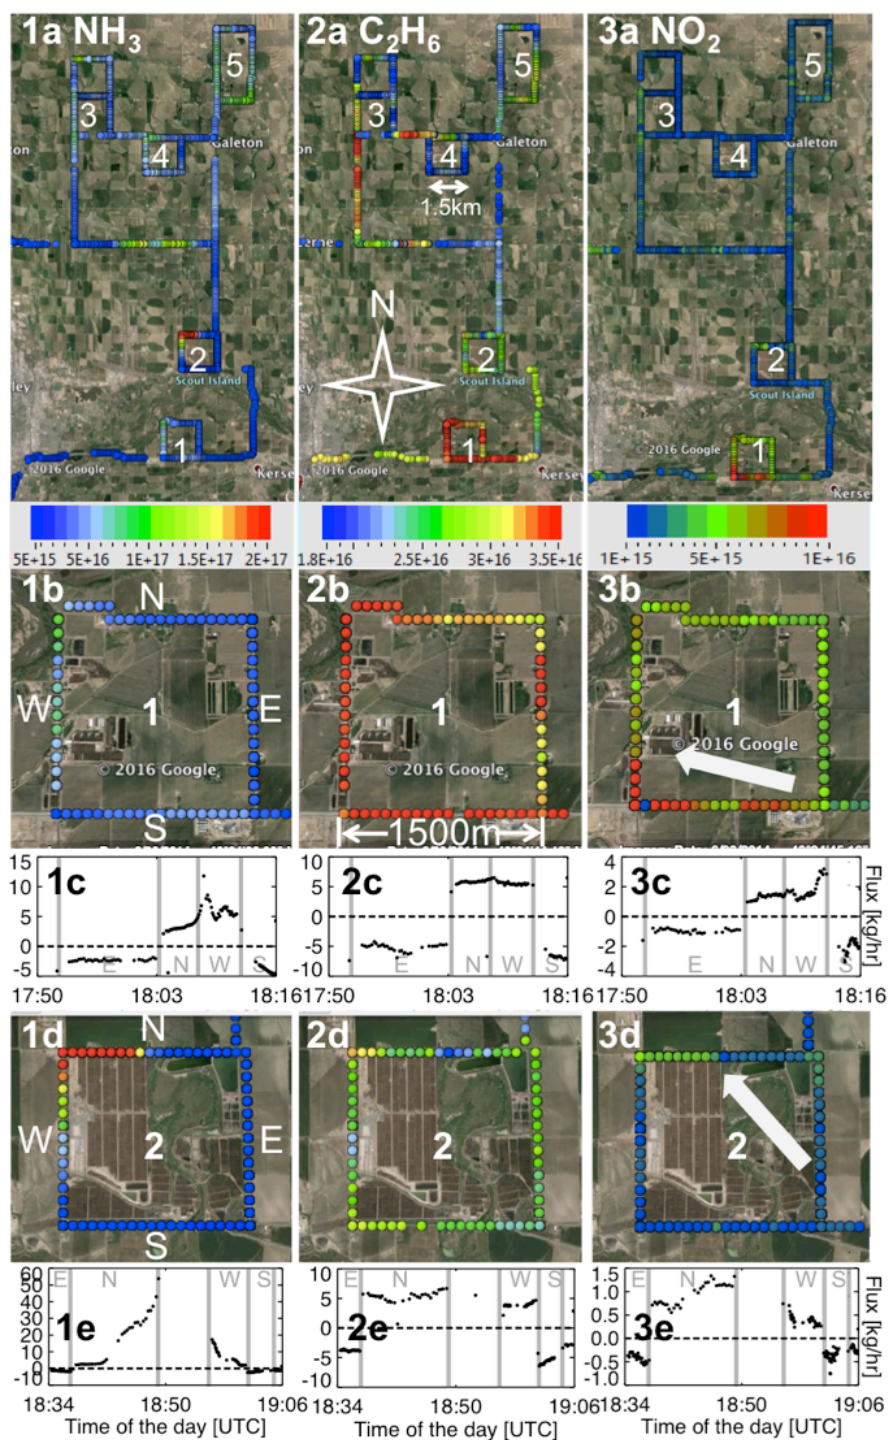

32

33 Figure S3: Zoom of the area east of Greeley, CO with the RD10 drive track color coded by the  
 34 VCD of (left column, 1)  $\text{NH}_3$ , (middle, 2)  $\text{C}_2\text{H}_6$ , and (right, 3)  $\text{NO}_2$ . Row (a) shows the 5 sites of  
 35 interest, (b) site 1, (d) site 2 from Fig. 6. Rows (c) and (e) show a timeseries of the flux,  
 36 calculated using equation (1); the arrows in 3b and 3d indicate the mean wind direction at each  
 37 site. (Background image from Google Earth 2016)

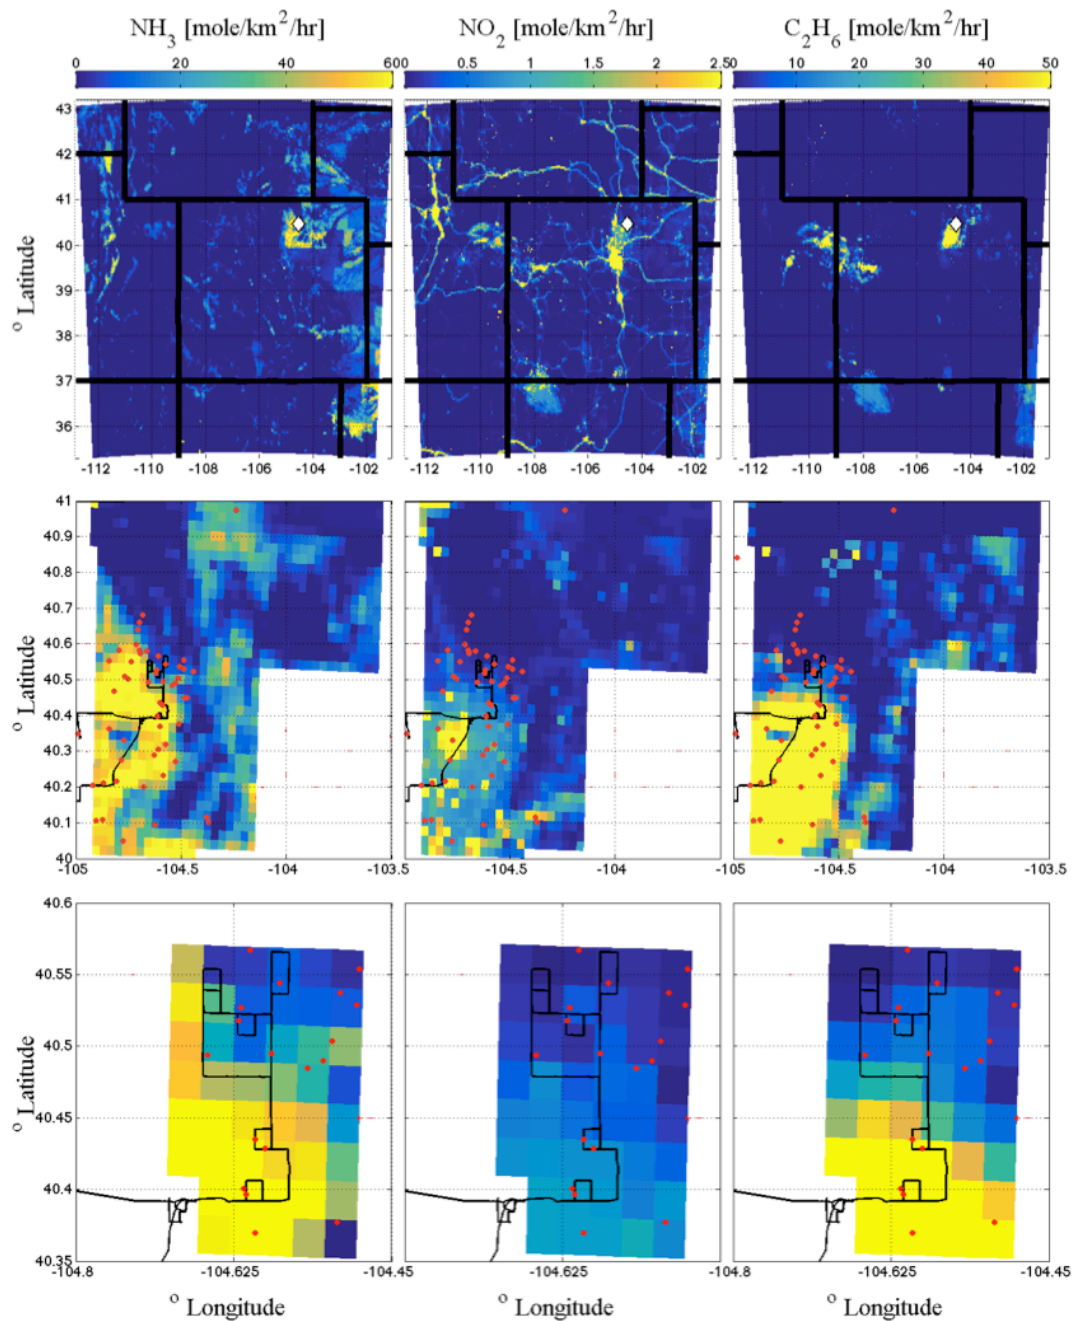

38  
 39 Figure S4: Emission Inventory (EPA, 2015) based on the July midday hourly emission rate  
 40 during which  $\text{NH}_3$  emission is larger than during other hours.  $\text{NH}_3$  (left),  $\text{NO}_2$  (center), and  $\text{C}_2\text{H}_6$   
 41 (right); the bold black lines in the top panel indicate the state borders with Colorado in the center;  
 42 the red dots in the middle and bottom panels indicate cattle and dairy farm locations, and the  
 43 black line the research drive track.
