# Supplementary material for: The CU Mobile Solar Occultation Flux instrument: structure functions and emission rates of NH 3 , NO 2 and C 2 H 6
Source: Copernicus journal article supplement (doi:10.5194/amt-2016-190), 2016-08-24
Supplement: Supplementary file [file amt-2016-190-AC1-supplement.pdf]

Dear Kang Sun,

We appreciate your comments to improve the manuscript. Below you will find our response in blue and modifications to the manuscript in green.

Page 4, line 108-109: ACE-FTS and MIPAS are not sensitive to the lower troposphere. Nadir remote sensing of ethane is extremely challenging because  $3000\text{ cm}^{-1}$  is right at the gap between reflected solar short-wave radiation and emitted earth long-wave radiation. Ground-based SOF is arguably the only way to directly quantify the VCD of ethane. The author may emphasize this point here or in section 3.5.

This is a good point. We will make the gap in observational capabilities in the lower troposphere (in absence of aircraft) transparent in the revised manuscript, and add reference to Streets et al. (2013) in support of the limited satellite sensitivity.

*Streets, D. G., et al., Emissions estimation from satellite retrievals: A review of current capability, Atmos. Environ., 77, 1011-1042, 2013.*

Line 113-114: However, satellite observations remain not very well validated (Dammers et al., 2016) and satellites quantifying  $\text{C}_2\text{H}_6$  VCDs are not sensitive to the lower troposphere (Streets et al., 2013).

Page 5, line 114-115: The authors claim that “there currently is no attempt to characterize the sub-satellite ground pixel variability of VCDs for  $\text{NH}_3$ ”. The large pixel-scale variability of  $\text{NH}_3$  near CAFOs has already been demonstrated by Sun et al. “Validation of TES ammonia observations at the single pixel scale in the San Joaquin Valley during DISCOVER-AQ”, DOI: 10.1002/2014JD022846. The value of this work is directly quantifying the VCD without assumptions of vertical profiles.

We agree, and note that our sentence correctly refers to the lack of information about the variability of “VCDs for  $\text{NH}_3$ ”. In the revised manuscript, we will mention explicitly that this eliminates assumptions about vertical distributions of  $\text{NH}_3$ , and allows for a more direct comparison with satellites.

We will also include reference  $\text{NH}_3$  validation of TES (Sun et al., 2014) and CrIS (Shephard and Cady-Pereira et al., 2015) using near surface in-situ measurements of  $\text{NH}_3$ , and aircraft.

*Sun, K., et al., Validation of TES ammonia observations at the single pixel scale in the San Joaquin Valley during DISCOVER-AQ, J. Geophys. Res. Atmos., 120, 5140-5154, doi:10.1002/2014JD022846, 2015.*

*Shephard, M. W. and Cady-Pereira, K. E., Cross-track Infrared Sounder (CrIS) satellite observations of tropospheric ammonia. Atmos. Meas. Tech., 8, 1323–1336, doi:10.5194/amt-8-1323-2015, 2015.*

Line 114-115: Previous satellite comparisons have used mobile in situ measurements of  $\text{NH}_3$  to characterize the near surface  $\text{NH}_3$  mixing ratio variability in the San Joaquin Valley in California, and compare with data from TES (Sun et al., 2015), and CrIS (Cross-track Infrared Sounder) satellites (Shephard and Cady-Pereira et al., 2015). To our knowledge there currently is no attempt to characterize the sub-satellite ground pixel variability using mobile VCD observations of  $\text{NH}_3$  and  $\text{C}_2\text{H}_6$ . Mobile VCD measurements eliminate the need for assumptions about  $\text{NH}_3$  and  $\text{C}_2\text{H}_6$  vertical distributions

Conclusion Section: Mobile SOF measurements of trace-gas VCDs are complementary to in-situ observations, eliminate assumptions about vertical distributions, and allow for a more direct comparison with satellites.

Table 6: Eddy-covariance measurements of NH<sub>3</sub> flux have been performed in cattle feedlots just 30 miles away from the CAFOs sampled in this study, but in colder temperature (Sun et al. "Open-path eddy covariance measurements of ammonia fluxes from a beef cattle feedlot", DOI: 10.1016/j.agrformet.2015.06.007). The flux measured in November was  $20 \text{ m}^2/\text{head} \times 36.7 \text{ } \mu\text{g}/\text{m}^2/\text{s} = 2.64 \text{ g}/\text{hr}/\text{head}$ , 25% of the summer flux reported in this study. Ammonia flux has also been shown to be highly temperature dependent. It will be interesting to consider the seasonality when comparing to the inventory.

We have added the data point to Table 6, and also added reference to Sun et al., 2015. We agree that temperature as well as seasonal variations in soil conditions are likely contributing factors to explain the differences in NH<sub>3</sub> fluxes.

*Sun, K., et al., Open-path eddy covariance measurements of ammonia fluxes from a beef cattle feedlot, Agric. For. Meteorol., 213, 193-202, doi:10.1016/j.agrformet.2015.06.007, 2015.*

The data will be added to Table 6
